# Supplementary material
Source: Elsevier journal article supplement (https://www.sciencedirect.com/science/article/pii/S0212656714002054)
Supplement: mmc1 [file S0212656714002054:mmc1.pdf]

## **Anexo online. Homogeneización en los criterios de elección de los pacientes de la muestra**

### **Participantes:**

Pacientes de 18 a 70 años de edad que acuden al médico de atención primaria consecutivamente y que refieren síntomas de depresión, ansiedad, o abuso de sustancias.

A efectos de este estudio, los síntomas (de cualquier intensidad o duración, tratados o no) cuya presencia indicará que el paciente es elegible para el estudio son:

- Síntomas depresivos: estado de ánimo irritable o deprimido, pérdida de interés o placer, alteración del sueño, pérdida de energía, fatiga, inquietud o inhibición, incapacidad para concentrarse, sentimientos de culpa, ideación suicida.
- Síntomas de ansiedad: preocupación excesiva, palpitaciones, sensación de "excitación", alteraciones del sueño, irritabilidad, obsesiones, compulsiones, recuerdos (*flashback*) recurrentes de eventos estresantes, o miedo injustificado.
- Síntomas o problemas relacionados con el consumo de sustancias susceptibles de abuso: abuso de alcohol, drogas ilegales, o medicamentos de prescripción con potencial adictivo (opiáceos, benzodiacepinas).

Para facilitar la homogeneidad en la aplicación de los criterios de elegibilidad se dispone de la siguiente batería de supuestos prácticos de pacientes/visitas/consultas elegibles y no elegibles

### **Unos ejemplos que pueden ayudarnos a aplicar de forma homogénea los criterios de elegibilidad de los pacientes:**

#### **Casos que SÍ cumplen criterios de elegibilidad**

- Un paciente que refiere que tiene problemas en el trabajo y tiene miedo de perder el empleo. Está nervioso, irritable, duerme mal ...
- Un paciente toxicómano en mantenimiento con metadona, acude para renovar una prescripción crónica de alprazolam 2 mg., 2 comps. cada día.
- Una paciente hipertensa acude para ver los resultados de unos análisis de sangre y de orina. Refiere, de pasada, que está triste, decaída, con poca energía...
- Un paciente en tratamiento con fluoxetina desde hace 6 meses por un cuadro de ansiedad y depresión (en su historia clínica no consta ningún diagnóstico específico). Acude para una visita de control y constatamos que hubo una rápida mejoría en los primeros meses y que actualmente sigue estable.
- Un paciente alcohólico afecto de una hepatopatía enólica. Acude para ver los resultados de una ecografía de control.
- Un paciente consulta porqué hace unos días tuvo una crisis de angustia. No es la primera vez que le sucede.

- Una mujer joven que nos pide una derivación al psicólogo. Refiere, sin concretar demasiado, ansiedad y problemas conyugales.

### **Casos que NO cumplen criterios de elegibilidad**

- Un paciente en tratamiento con paroxetina desde hace 2 años. Acude a una visita de control de su diabetes. No se menciona el problema psiquiátrico ni el tratamiento antidepresivo en el transcurso de la visita.
- Una paciente consumidora habitual de cannabis, en una ocasión anterior nos había solicitado ayuda para abandonar el hábito. Hoy acude por un resfriado común. Ni ella ni el médico mencionan el consumo de cannabis.
- Un paciente diagnosticado de depresión que está en tratamiento con sertralina y lorazepam desde hace tres semanas. Hoy acude a nuestra consulta como acompañante de su esposa.
- Una adolescente que ha sufrido un desvanecimiento en clase. Diagnosticamos una lipotimia.
- Una mujer consulta porque está preocupada por su hijo. Sospecha que puede estar consumiendo drogas.
- Una mujer de 65 años acude para comentar el informe de una mamografía rutinaria. Se ha hallado un nódulo que debe ser biopsiado. Está muy preocupada y temerosa.
